# Supplementary material for: Antipolar and short- and long-range magnetic ordering in quasi-two-dimensional AgCrP 2 S 6
Source: Royal Society of Chemistry journal article supplement (doi:10.1039/d5tc03093e), 2025-12-23
Supplement: d5tc03093e1.pdf [file d5tc03093e1.pdf]

## **Supplemental Material:**

### **Antipolar and short and long-range magnetic ordering in quasi-two-dimensional AgCrP<sub>2</sub>S<sub>6</sub>**

Chaitanya B. Auti<sup>1,\*</sup>, Atul G. Chakkar<sup>1</sup>, Shantanu Semwal<sup>2</sup>, Sebastian Selter<sup>3</sup>, Yuliia Shemerliuk<sup>3</sup>, Bernd Büchner<sup>3,4</sup>, Saicharan Aswartham<sup>3</sup>, Koushik Pal<sup>2</sup>, and Pradeep Kumar<sup>1#</sup>

<sup>1</sup>*School of Physical Sciences, Indian Institute of Technology, Mandi-175005, India.*

<sup>2</sup>*Department of Physics, Indian Institute of Technology Kanpur, Kanpur 208016, India*

<sup>3</sup>*Institute for Solid State Research, Leibniz IFW Dresden, Helmholtzstr. 20, 01069 Dresden, Germany*

<sup>4</sup>*Institute of Solid State and Materials Physics and Würzburg-Dresden Cluster of Excellence ct.qmat, Technische Universität Dresden, 01062 Dresden, Germany*

#### **S1. Analysis of polarization dependent intensity:**

The polarization-dependent measurements were performed by gradually rotating the incident light polarization using a half-wave plate ( $\lambda/2$  plate) with increments of 20 degree, ranging from 0 to 180 degrees, while the polarization of the scattered light was fixed by using an analyzer. For convenience, we have mirrored the data points from 0 to 180 degrees.

The variation in intensity as a function of polar angle can be understood using a semi-classical approach. The Raman scattering intensity ( $I$ ) is expressed as  $I \propto |\hat{e}_s^T \cdot R \cdot \hat{e}_i|^2$ , where  $T$  is the transpose of the vector and  $R$  is the Raman tensor [1].  $\hat{e}_i$  and  $\hat{e}_s$  represent unit vectors in the direction of incident and scattered light, respectively. For the above-mentioned configuration, incident and scattered light polarization unit vectors are given as  $\hat{e}_i = [\cos(\theta + \theta_0) \quad \sin(\theta + \theta_0) \quad 0]$  and  $\hat{e}_s = [\cos(\theta_0) \quad \sin(\theta_0) \quad 0]$ , where  $\theta$  is the relative angle between  $\hat{e}_i$  and  $\hat{e}_s$ , whereas  $\theta_0$  is an arbitrary angle of scattered light from the X-axis when polarization unit vectors are projected in the XY-plane ( $ab$ -plane) as shown in the schematic, see Fig. S14. The Raman tensors for the phonon modes with  $A_g$  and  $B_g$  symmetries are listed in Table I. The angular dependence of the intensity of these modes is given as:

$$I_{A_g} = |b \cos(\theta + \theta_0) \cos \theta_0 + c \sin(\theta + \theta_0) \sin \theta_0|^2, \quad (1)$$

$$I_{B_g} = |f \sin(\theta + 2\theta_0)|^2, \quad (2)$$

without the loss of generality,  $\theta_0$  may be taken as zero, resulting in the expression (4) and (5) becomes:

$$I_{A_g} = |b|^2 \cos^2 \theta, \quad (3)$$

$$I_{B_g} = |f|^2 \sin^2 \theta. \quad (4)$$

The polarization dependence of the intensity of some phonon modes cannot be fitted using purely real tensor elements; therefore, a complex form of the Raman tensor should be used to describe the observed polarization dependence [2]. Here, the tensor element of  $A_g$  and  $B_g$  can be written as:  $b = |b|e^{i\phi_b}$  and  $c = |c|e^{i\phi_c}$ , where  $\phi_b$  and  $\phi_c$  are the corresponding phases. Incorporating these complex elements, along with the polarization vectors  $\hat{e}_i$  and  $\hat{e}_s$ , and the Raman tensor elements, into eqn (1) yields a modified equation of angular dependence intensities for  $A_g$  and  $B_g$  given as eqn (4) and (5) (see the main text).

## S2. Temperature-dependent Photoluminescence:

Bulk  $\text{AgCrP}_2\text{S}_6$  shows an indirect band gap, however, its flat band structure suggests that it may behave like a direct bandgap material. The photoluminescence (PL) spectra recorded using 532 nm laser displays a peak at  $\sim 1.32/1.34$  eV at temperature  $\sim 6/300$  K. Figure S16(a) represent the temperature evolution of the PL spectra in the temperature range of 6-300 K. The obtained spectrum shows an asymmetric lineshape; therefore, it is fitted using a bi-Gaussian function to extract the temperature-dependent energy (peak position), linewidth, and intensity. The asymmetry observed on the low-energy side of the PL spectrum may have many origins. At low temperatures, the occupation of lower energy states increases, potentially enhancing the contribution of dark excitons or recombination pathways involving localized

states, which can leads to asymmetry [3]. Additionally, preferential localization of cations within lattice may induces local dipole moments (stark effect), this can also contribute to asymmetry in PL spectra [4]. Figure S16(c-i) shows the temperature-dependent PL energy of  $\text{AgCrP}_2\text{S}_6$  as extracted from our measurements. We observed a redshift up to  $\sim 40$  K, possibly due to the lowering of the conduction band energy by the exchange interaction of the magnetic ions and conduction electrons [5]. Furthermore, at  $\sim 90$  K a sharp change in slope is observed indicating anomaly at this temperature. A kink is observed at  $\sim 200$  K, indicating another anomaly at  $\sim 200$  K. Interestingly, temperature evolution of the PL spectra exhibits an unusual blueshift with increasing temperature, contrary to the typical behaviour observed in most semiconductors (see Fig. S16(b)). This anomalous temperature dependence cannot be accurately described using traditional empirical models like the Varshni [6], Pässler [7], and Bose-Einstein [8], which are commonly used for conventional semiconductors. This discrepancy likely arises from competing effects of electron-phonon renormalization and lattice thermal expansion on the band gap energy [9]. Similar type of behaviour is also reported for some perovskites [9,10]. From linear fitting, the energy obtained at 0 K is represented as  $E_0 = 1.32$  eV. The continuous blue-shift in energy above temperature 90 K can be characterized by a temperature coefficient  $\alpha = \partial E / \partial T = 0.071$  meVK $^{-1}$ .

The temperature-dependent FWHM, denoted as  $\Delta(T)$  and determined from the spectral lineshape, is plotted in Fig. S16(c-ii). It is observed that FWHM shows a kink  $\sim 40$  K, after which it starts rapidly increasing from  $\sim 90$  K. We use a linear exciton-phonon coupling model, commonly employed to analyse  $\Delta(T)$ , given as [11]:

$$\Delta(T) = \Delta_0 + \lambda_{\text{AC}}T + \lambda_{\text{LO}}N_{\text{LO}}(T), \quad (5)$$

where the  $\Delta_0$  term accounts for linewidth broadening due to various factors such as impurities, dislocations, and imperfections. The second term of equation arises from exciton interactions

with acoustic phonons. The final term arises from exciton interactions with longitudinal optical (LO) phonon and is proportional to the Bose function, which represents the population of phonons at finite temperature and is given as:  $N_{LO}(T) = 1/[e^{(E_{LO}/k_b T)} - 1]$ ; where  $E_{LO}$  is the energy of LO phonons and  $k_b$  is the Boltzmann constant. The coefficients  $\lambda_{AC}$  and  $\lambda_{LO}$  represent coupling strength of the exciton-acoustic/LO phonons, respectively. Exciton-LO phonon interactions are understood through the Fröhlich mechanism, while exciton-acoustic phonon interactions are described by the deformation potential. From the fitting eqn (5), the parameters obtained as follows:  $\Delta_0 = 91.16 \pm 2.39$  meV,  $\lambda_{AC} = 203.76 \pm 18.60$   $\mu\text{eV K}^{-1}$ ,  $\lambda_{LO} = 3.98 \pm 2.46$  eV,  $E_{LO} = 123.46 \pm 17.69$  meV. The exciton-acoustic phonon coupling strength is orders of magnitude smaller than the exciton-optical phonon coupling strength, indicating that optical phonons contribute significantly more to linewidth broadening than acoustic phonons. This is consistent with the observed large LO phonon energy. The temperature-dependent (PL) intensity, shown in Fig. S16(c-iii), decreases drastically from 6 K to 90 K. This intensity decrease is primarily attributed to thermal quenching. At low temperatures, the luminescence internal quantum efficiency is high because non-radiative recombination centres are minimized. As the temperature increases, these centres become thermally activated, capturing more photogenerated carriers. This, in turn, reduces the number of carriers available for radiative recombination, resulting in the observed decrease in the PL intensity [12]. Above  $\sim 200$  K, the intensity then gradually increases with rising temperature, reason associated with this anomalous increase of intensity is unknown; however, we should stress that the anomalous temperature dependent PL of  $\text{AgCrP}_2\text{S}_6$  demands further theoretical and experimental investigations.

Figures:

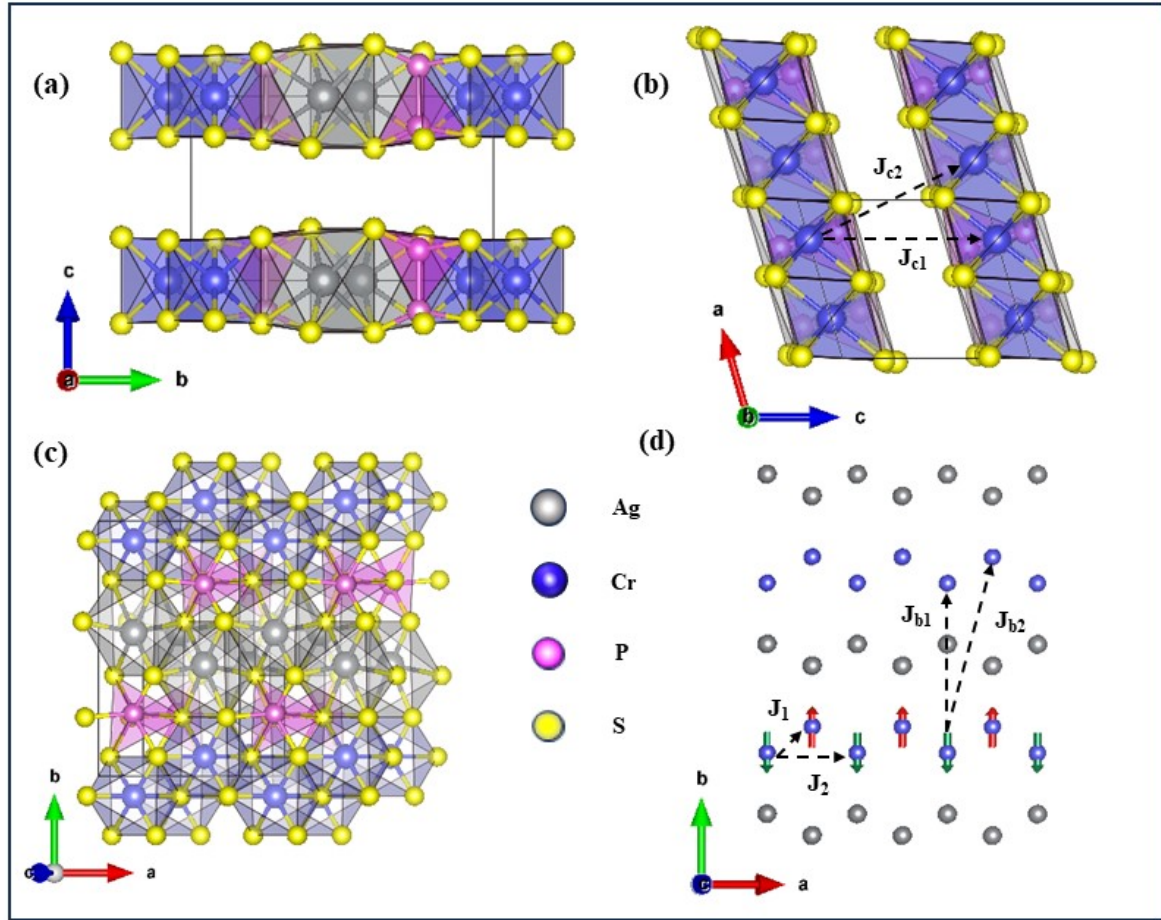

**Figure S1.** (a)-(c) Shows the crystal structure of  $\text{AgCrP}_2\text{S}_6$  in the  $bc$ ,  $ac$ , and  $ab$  plane, respectively. (d) Zigzag chains of magnetic  $\text{Cr}^{3+}$  ions (spin up and down shown by arrows) and nonmagnetic  $\text{Ag}^+$  ions.

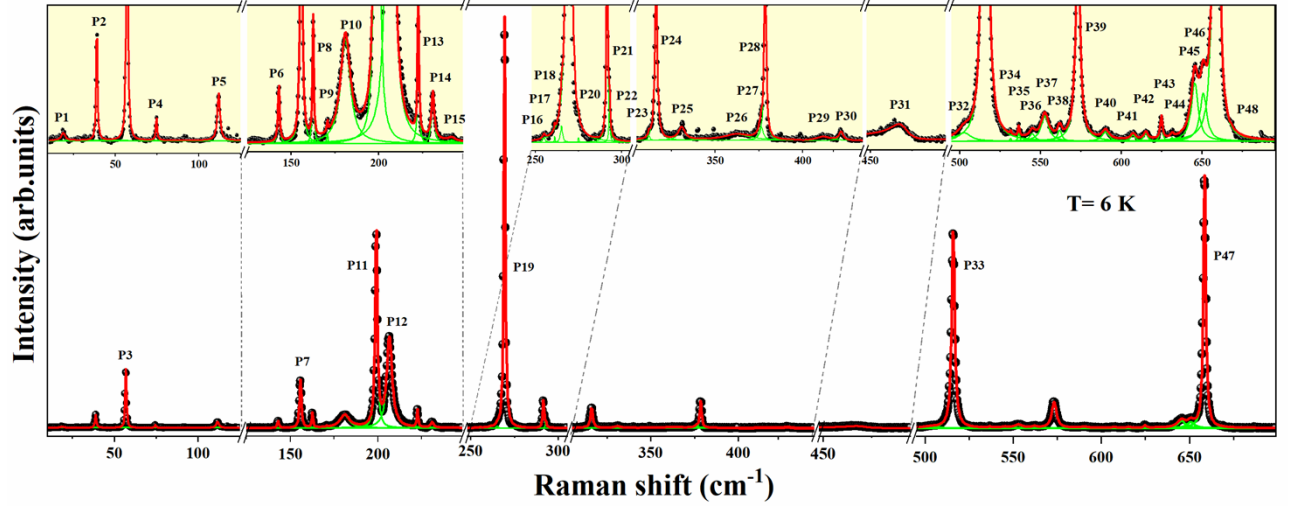

**Figure S2.** Fitted Raman spectrum of the single crystal of AgCrP<sub>2</sub>S<sub>6</sub> in the spectral range of 15-700 cm<sup>-1</sup> recorded at 6 K. The observed phonon modes are labelled as P1-P48. Solid thin line (green line) indicates the individual fit of the phonon modes and solid (red line) indicate the total fit of the Raman spectra.

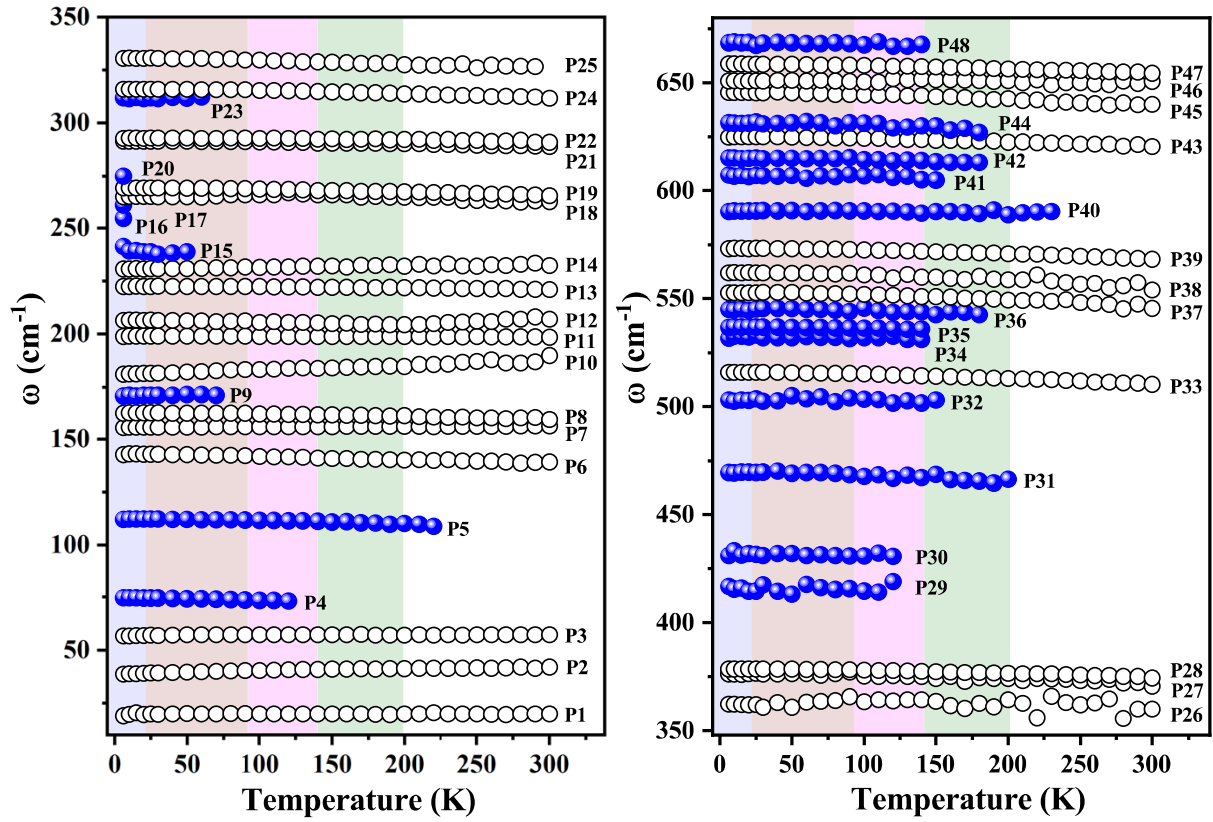

**Figure S3.** Temperature dependence frequency shift of all the observe phonon modes from P1-P48. Blue solid spheres represent the disappeared modes. Hollow circles represent phonon modes which survives at all temperatures. Blue, brown, pink, and green shaded regions show the temperature range of 0-20 K, 20-90 K, 90-140 K, and 140-200 K, respectively, which shows the regions of anomalies reflecting multiple transitions.

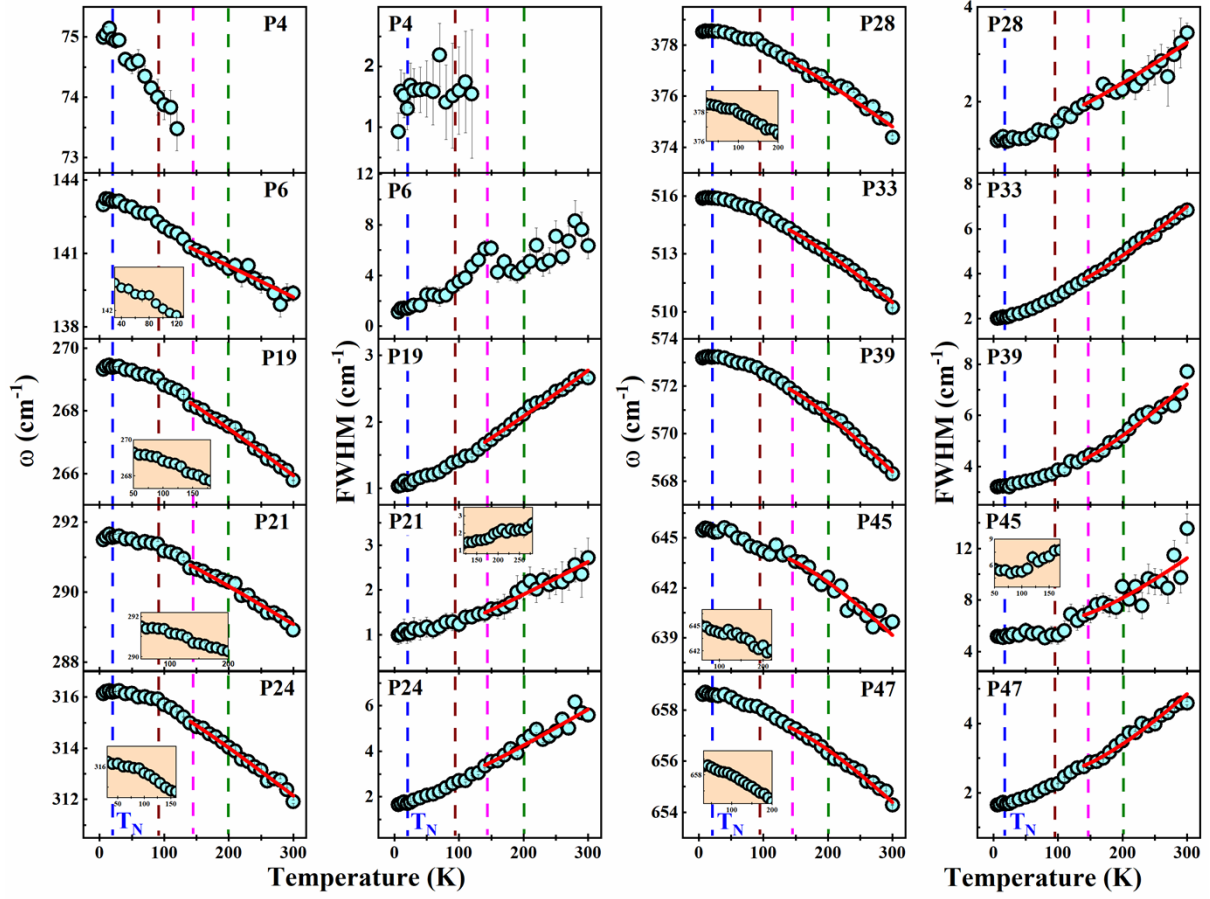

**Figure S4.** Temperature evolution of mode frequency and linewidth (FWHM) of phonon modes P4, P6, P19, P21, P24, P28, P33, P39, P45 and P47. The solid red line represents a three-phonon fitting in the temperature range of 140 to 300 K, whereas the dashed blue line indicates the antiferromagnetic transition at  $T_N \sim 20$  K. The dashed brown, pink, and green lines reflect temperature anomalies at  $\sim 90$  K,  $\sim 140$  K, and  $\sim 200$  K, respectively. Inset shows the magnified image of corresponding anomalies in frequency and FWHM.



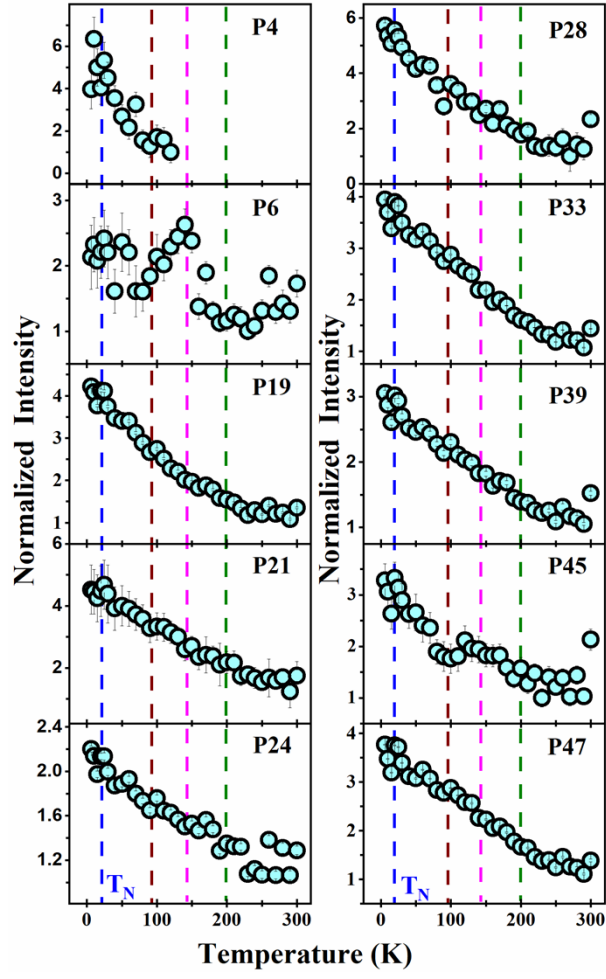

**Figure S5.** Shows temperature dependence of normalised intensity of modes P4, P6, P19, P21, P24, P28, P33, P39, P45 and P47.

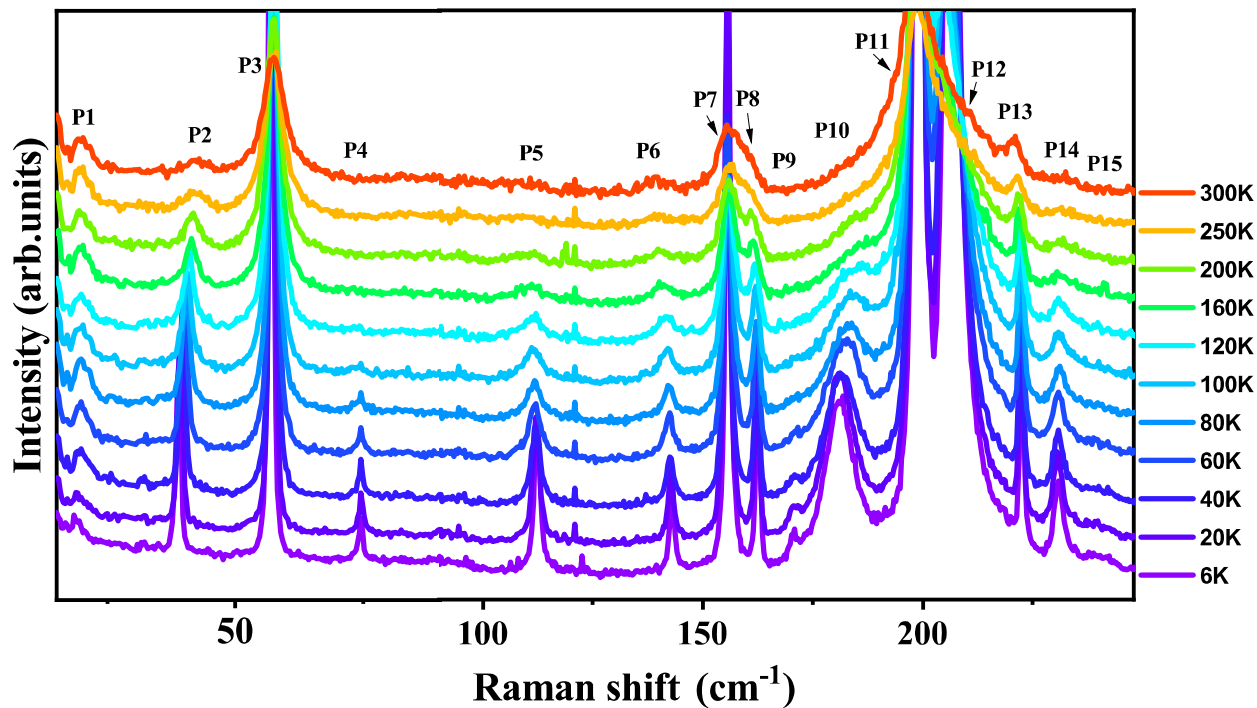

**Figure S6.** Shows Temperature evolution of the Raman spectrum of  $\text{AgCrP}_2\text{S}_6$  in the frequency range of 15-250  $\text{cm}^{-1}$ . Mode P4, P5, P9, and P15 disappeared at higher temperature.

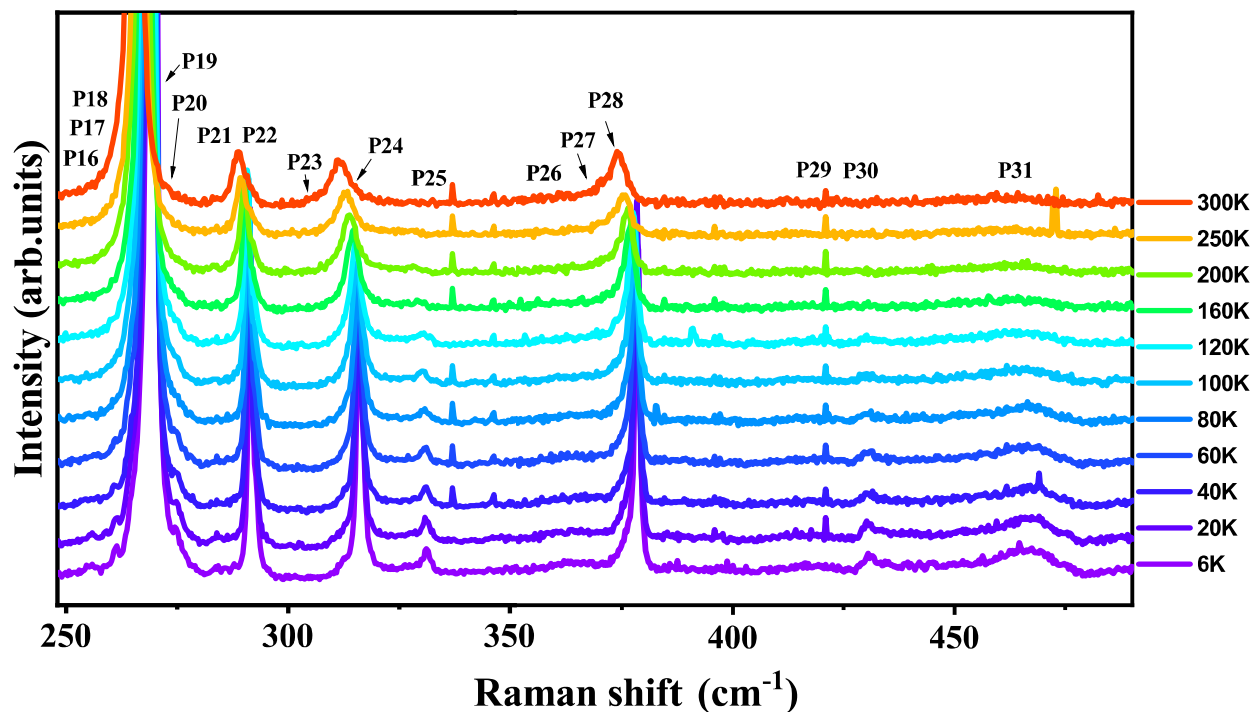

**Figure S7.** Shows Temperature evolution of the Raman spectrum of  $\text{AgCrP}_2\text{S}_6$  in the frequency range of 250-490  $\text{cm}^{-1}$ . Mode P16, P17, P20, P23, P25, P29, P30, and P31 disappeared at higher temperature.

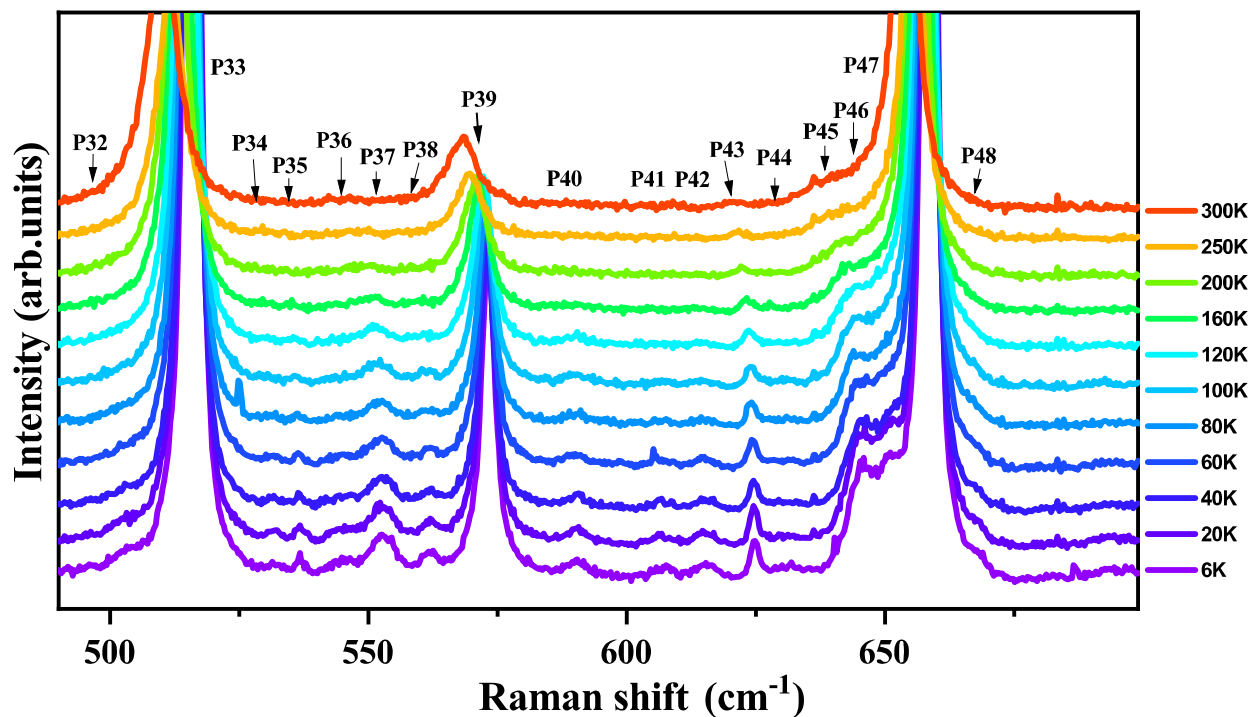

**Figure S8.** Shows Temperature evolution of the Raman spectrum of  $\text{AgCrP}_2\text{S}_6$  in the frequency range of  $490\text{--}700\text{ cm}^{-1}$ . Mode P32, P34, P35, P36, P40, P41, P42, P44, and P48 disappeared at higher temperature.

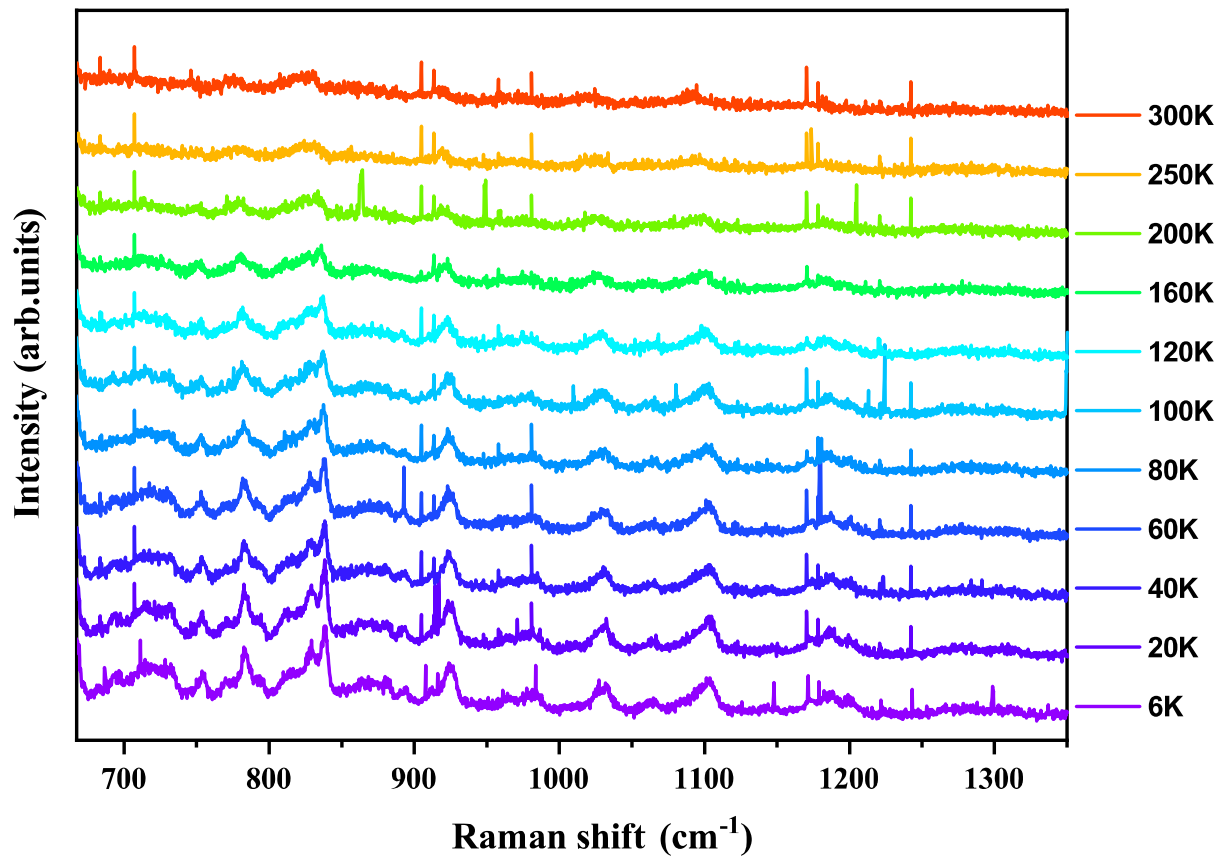

**Figure S9.** Temperature evolution of higher order modes in the frequency range of  $670\text{ cm}^{-1}$  to  $1350\text{ cm}^{-1}$ .

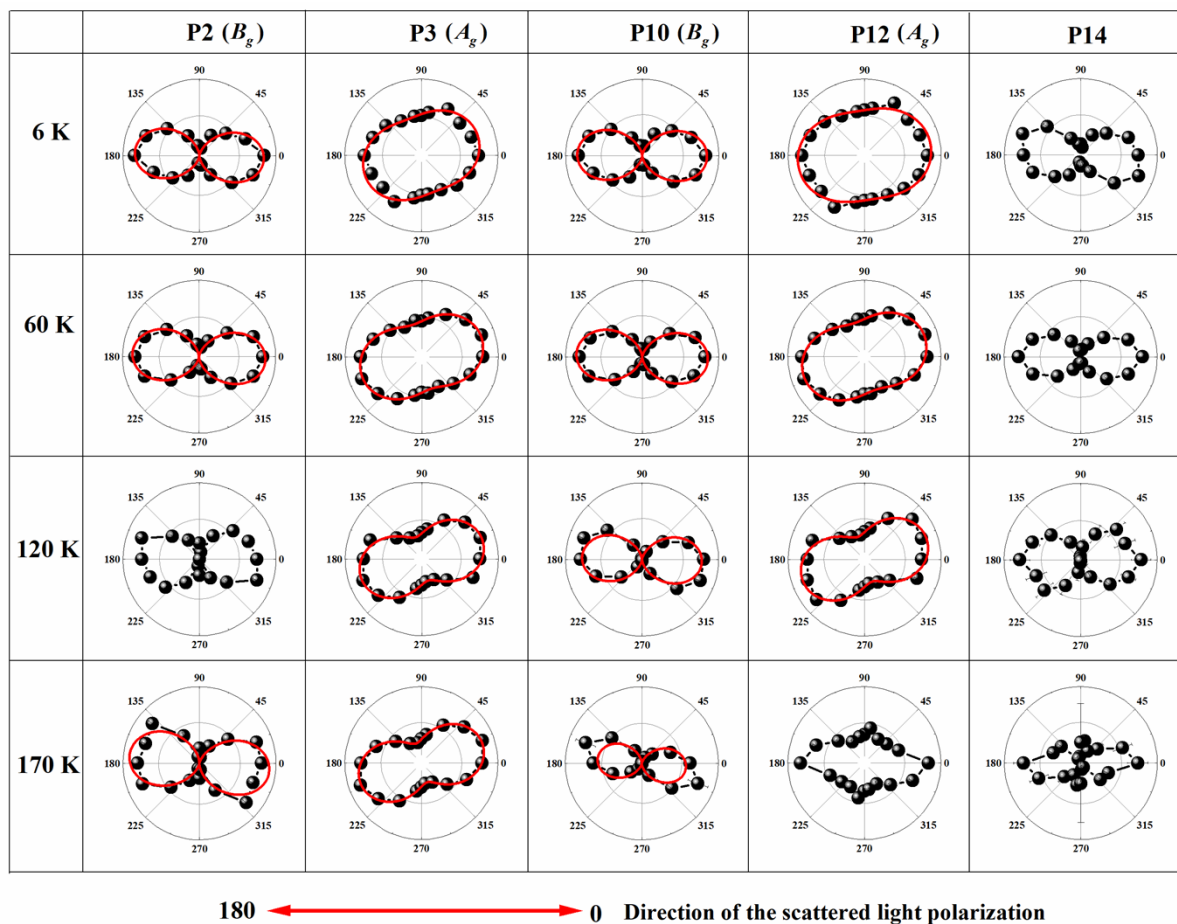

**Figure S10.** Polarization-dependent intensity of the phonon modes P2, P3, P10, P12, and P14 measured at temperatures of 6 K, 60 K, 120 K, and 170 K, respectively; with varying incident light polarization. The solid red line at the bottom indicates the direction of the scattered light polarization.

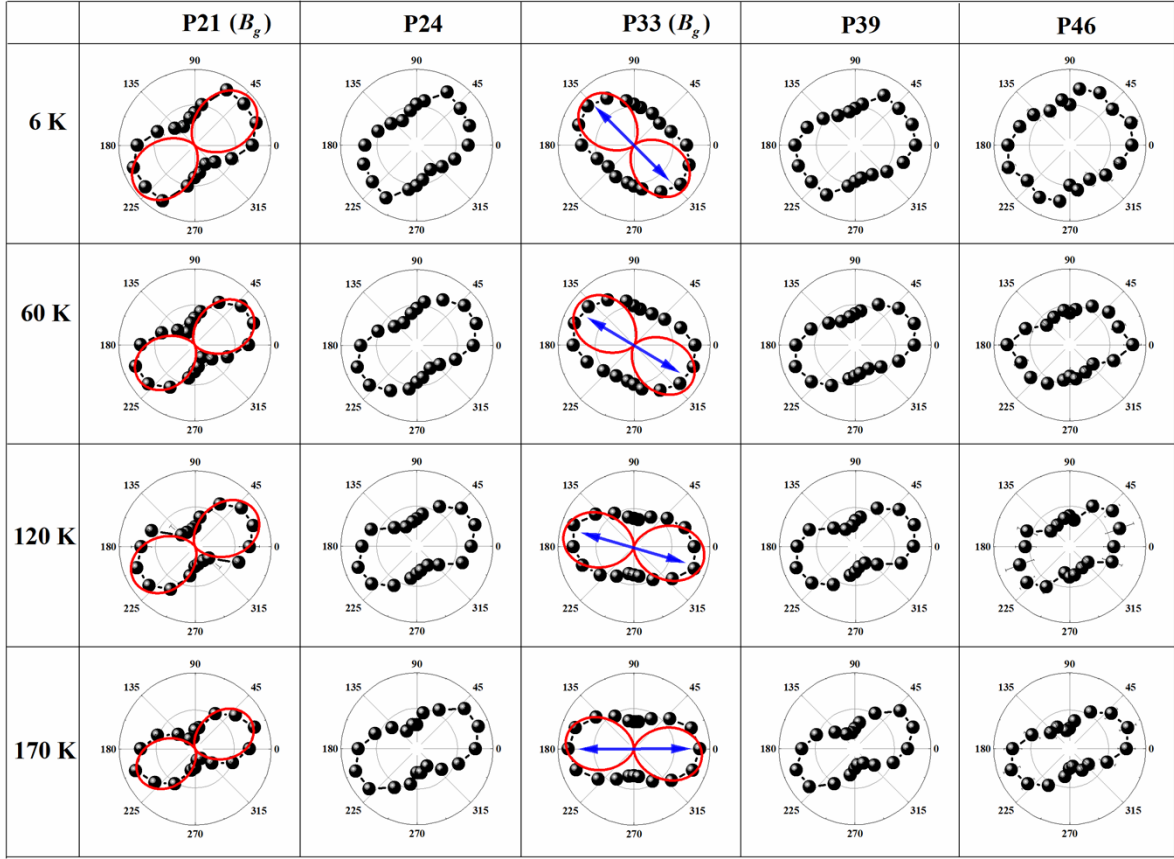

180  0 Direction of the scattered light polarization

**Figure S11.** Polarization-dependent intensity of the phonon modes P21, P24, P33, P39, and P46 measured at temperatures of 6 K, 60 K, 120 K, and 170 K, respectively; with varying incident light polarization. A blue arrow represents the rotation of the axis, showing the maxima as a function of temperature. The solid red line at the bottom indicates the direction of the scattered light polarization.



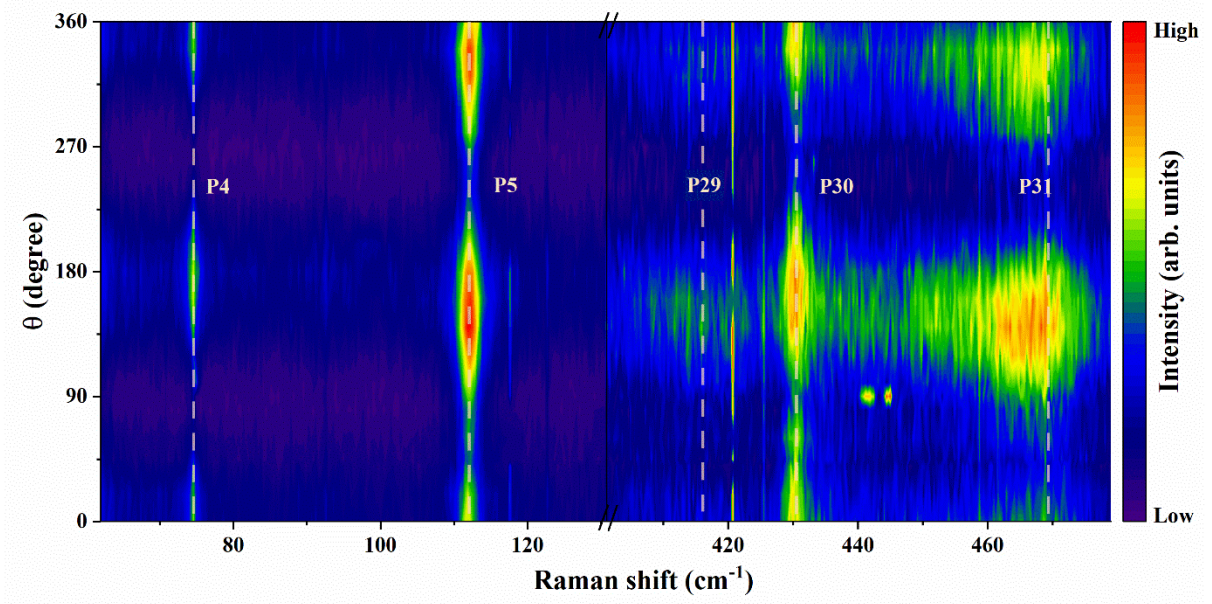

**Figure S12.** 2D colour contour map of polarization-dependent intensity of the phonon modes P4, P5, P29, P30, and P31 measured at 6 K.

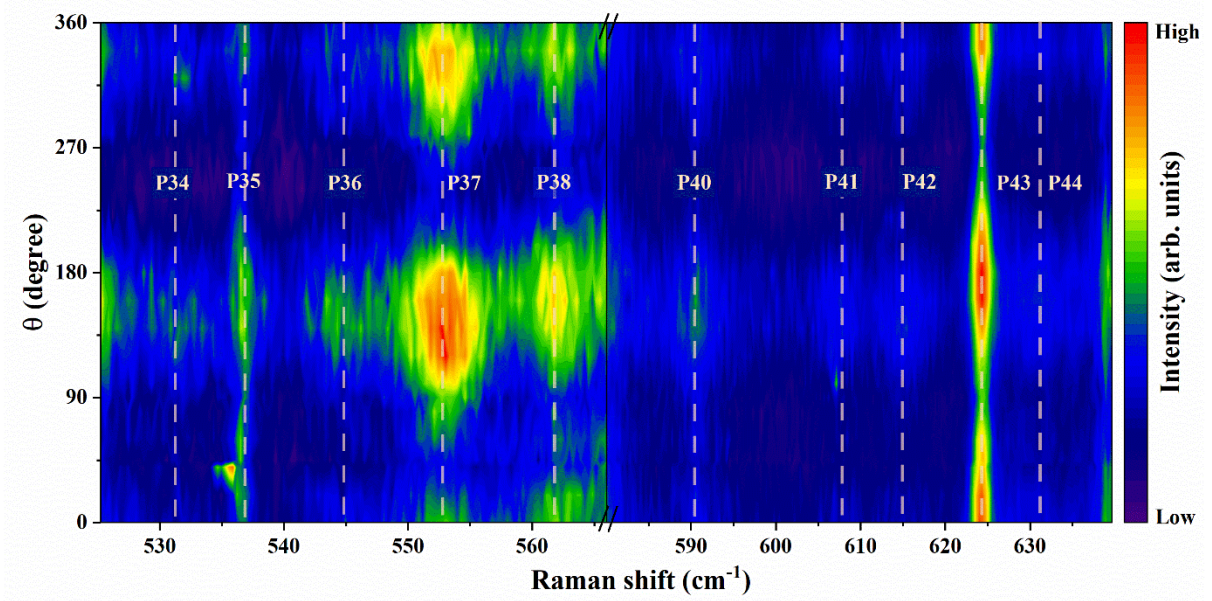

**Figure S13.** 2D colour contour map of polarization-dependent intensity of the phonon modes P34, P35, P36, P37, P38, P40, P41, P42, P43 and P44 measured at 6 K.

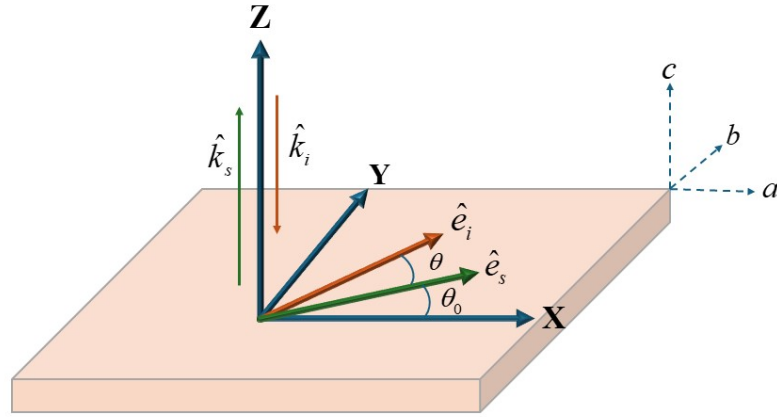

**Figure S14.** Schematic showing plane projection of the polarization direction of the incident ( $\hat{e}_i$ ) and scattered light ( $\hat{e}_s$ ) making angle  $\theta + \theta_0$  and  $\theta$  with X-axis, respectively.  $\hat{k}_i$  and  $\hat{k}_s$  represents the direction of incident and scattered beam.



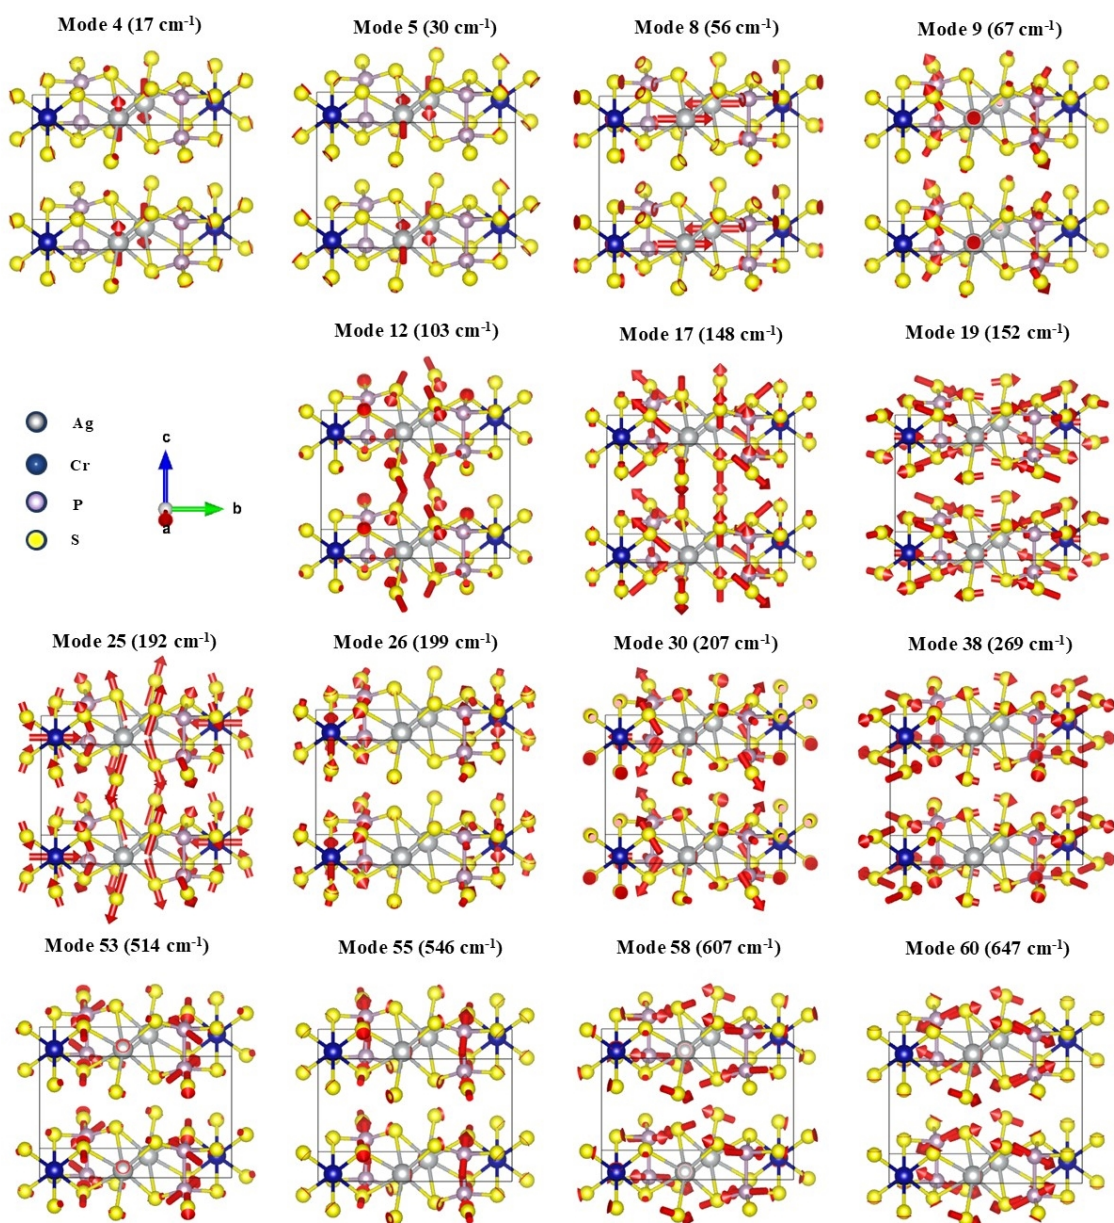

**Figure S15.** Mode visualization of some of the Raman active modes at  $\Gamma$ - point. Grey, blue, violet, and yellow spheres represent Ag, Cr, P, and S atoms, respectively. Red arrows on the atoms represent the direction of motion of the atoms and the size of the arrows represent the relative magnitude of vibration.

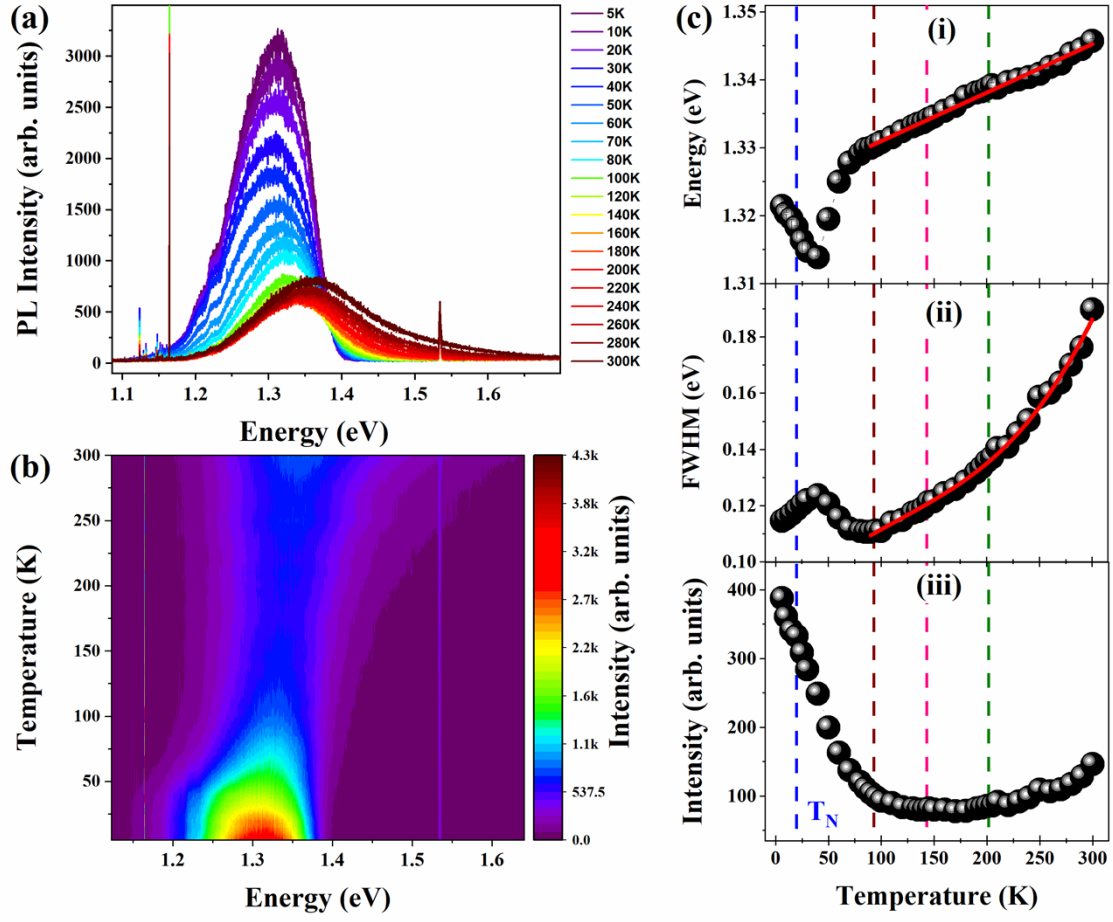

**Figure S16.** (a) Shows temperature evolution of PL. (b) Shows a colour contour plot of PL intensity in temperature-energy plane. (c-i) Temperature dependence of energy. (c-ii) Temperature dependence of FWHM. The red line shows the fitted curve as described in the text. (c-iii) Temperature dependence of PL intensity. The dashed blue line indicates the antiferromagnetic transition at  $T_N \sim 20$  K. The dashed brown, pink, and green lines reflect temperature anomalies at  $\sim 90$  K,  $\sim 140$  K, and  $\sim 200$  K, respectively.

# Tables:

**Table S1.** List of the experimentally observed modes with their frequencies at 6 K and 300 K. The calculated phonon frequencies on the basis of first-principles calculations are denoted by  $\omega_{DFT}$ . Units are in  $\text{cm}^{-1}$ .

| Modes | $\omega$ (6 K)   | $\omega$ (300 K) | Symmetry assignment | $\omega_{DFT}$ |
|-------|------------------|------------------|---------------------|----------------|
| P1    | $19.0 \pm 0.10$  | $19.9 \pm 0.09$  | $B_g$               | 17             |
| P2    | $38.8 \pm 0.03$  | $42.2 \pm 0.18$  | $B_g$               | 30             |
| P3    | $56.9 \pm 0.01$  | $57.5 \pm 0.02$  | $A_g$               | 56             |
| P4    | $74.9 \pm 0.09$  | -                | $B_g$               | 67             |
| P5    | $112.3 \pm 0.03$ | -                | $A_g$               | 103            |
| P6    | $142.9 \pm 0.11$ | $139.4 \pm 0.34$ | $B_g$               | 148            |
| P7    | $155.7 \pm 0.01$ | $156.4 \pm 0.13$ | $A_g$               | 152            |
| P8    | $162.5 \pm 0.04$ | $159.5 \pm 0.21$ | $B_g$               | 156            |
| P9    | $170.7 \pm 0.41$ | -                | $A_g$               | 169            |
| P10   | $181.0 \pm 0.15$ | $189.9 \pm 0.65$ | $B_g, A_g$          | 178, 192       |
| P11   | $199.0 \pm 0.00$ | $198.6 \pm 0.05$ | $B_g$               | 199            |
| P12   | $206.5 \pm 0.01$ | $207.1 \pm 0.43$ | $A_g$               | 207            |
| P13   | $222.5 \pm 0.04$ | $221.1 \pm 0.11$ | $B_g$               | 213            |
| P14   | $230.9 \pm 0.18$ | $232.6 \pm 0.45$ | -                   | -              |
| P15   | $241.7 \pm 4.05$ | -                | -                   | -              |
| P16   | $254.9 \pm 3.81$ | -                | -                   | -              |
| P17   | $261.2 \pm 0.88$ | -                | -                   | -              |
| P18   | $265.1 \pm 0.85$ | $263.0 \pm 0.26$ | $B_g$               | 266            |
| P19   | $269.3 \pm 0.00$ | $265.8 \pm 0.01$ | $A_g$               | 269            |
| P20   | $274.9 \pm 0.72$ | -                | $A_g, B_g$          | 278, 279       |
| P21   | $291.4 \pm 0.06$ | $288.9 \pm 0.17$ | $B_g$               | 293            |
| P22   | $292.8 \pm 0.36$ | $291.1 \pm 0.78$ | -                   | -              |
| P23   | $312.1 \pm 0.26$ | -                | -                   | -              |
| P24   | $316.1 \pm 0.00$ | $311.9 \pm 0.06$ | -                   | -              |
| P25   | $330.7 \pm 0.18$ | -                | $A_g$               | 346            |
| P26   | $362.2 \pm 0.94$ | $359.8 \pm 1.82$ | -                   | -              |
| P27   | $376.1 \pm 0.18$ | $370.6 \pm 0.42$ | -                   | -              |
| P28   | $378.5 \pm 0.00$ | $374.4 \pm 0.07$ | -                   | -              |
| P29   | $416.7 \pm 0.49$ | -                | $B_g$               | 407            |
| P30   | $431.0 \pm 0.11$ | -                | -                   | -              |
| P31   | $469.5 \pm 0.33$ | -                | $A_g$               | 465            |
| P32   | $503.0 \pm 0.91$ | -                | $A_g$               | 486            |

|     |                  |                  |       |     |
|-----|------------------|------------------|-------|-----|
| P33 | $515.8 \pm 0.00$ | $510.2 \pm 0.01$ | $B_g$ | 514 |
| P34 | $531.6 \pm 0.73$ | -                | -     | -   |
| P35 | $536.6 \pm 0.24$ | -                | -     | -   |
| P36 | $545.0 \pm 0.75$ | -                | $A_g$ | 546 |
| P37 | $552.7 \pm 0.25$ | $545.4 \pm 0.89$ | -     | -   |
| P38 | $561.9 \pm 0.41$ | $554.0 \pm 1.78$ | -     | -   |
| P39 | $573.1 \pm 0.02$ | $568.3 \pm 0.06$ | -     | -   |
| P40 | $590.3 \pm 0.59$ | -                | -     | -   |
| P41 | $607.2 \pm 0.78$ | -                | $B_g$ | 607 |
| P42 | $615.2 \pm 0.56$ | -                | -     | -   |
| P43 | $624.8 \pm 0.13$ | $620.4 \pm 0.41$ | -     | -   |
| P44 | $631.5 \pm 0.93$ | -                | -     | -   |
| P45 | $645.4 \pm 0.14$ | $639.9 \pm 0.41$ | -     | -   |
| P46 | $650.7 \pm 0.16$ | $650.5 \pm 0.44$ | -     | -   |
| P47 | $658.6 \pm 0.00$ | $654.3 \pm 0.02$ | $A_g$ | 647 |
| P48 | $668.5 \pm 4.19$ | -                | -     | -   |

**Table S2.** Frequencies and symmetry labels of all 60 modes based on first-principles calculations of phonon frequencies at  $\Gamma$  - point for  $\text{AgCrP}_2\text{S}_6$ .

| Mode No. | Frequency | Symmetry | Mode No. | Frequency | Symmetry |
|----------|-----------|----------|----------|-----------|----------|
| 1        | 0         | $B_u$    | 31       | 210       | $B_u$    |
| 2        | 0         | $A_u$    | 32       | 213       | $B_g$    |
| 3        | 0         | $B_u$    | 33       | 223       | $B_u$    |
| 4        | 17        | $B_g$    | 34       | 227       | $A_u$    |
| 5        | 30        | $B_g$    | 35       | 245       | $A_u$    |
| 6        | 37        | $B_u$    | 36       | 250       | $B_u$    |
| 7        | 43        | $B_u$    | 37       | 266       | $B_g$    |
| 8        | 56        | $A_g$    | 38       | 269       | $A_g$    |
| 9        | 67        | $B_g$    | 39       | 278       | $A_g$    |
| 10       | 78        | $A_u$    | 40       | 279       | $B_g$    |
| 11       | 92        | $B_g$    | 41       | 282       | $B_u$    |
| 12       | 103       | $A_g$    | 42       | 293       | $B_g$    |
| 13       | 111       | $B_u$    | 43       | 295       | $A_u$    |
| 14       | 113       | $A_u$    | 44       | 317       | $B_u$    |
| 15       | 125       | $B_u$    | 45       | 346       | $A_u$    |
| 16       | 135       | $B_g$    | 46       | 346       | $A_g$    |
| 17       | 148       | $B_g$    | 47       | 399       | $B_u$    |

|    |     |       |    |     |       |
|----|-----|-------|----|-----|-------|
| 18 | 150 | $B_u$ | 48 | 407 | $B_g$ |
| 19 | 152 | $A_g$ | 49 | 427 | $A_u$ |
| 20 | 156 | $B_g$ | 50 | 465 | $A_g$ |
| 21 | 169 | $A_g$ | 51 | 486 | $A_g$ |
| 22 | 174 | $A_u$ | 52 | 487 | $A_u$ |
| 23 | 178 | $B_g$ | 53 | 514 | $B_g$ |
| 24 | 184 | $A_u$ | 54 | 517 | $B_u$ |
| 25 | 192 | $A_g$ | 55 | 546 | $A_g$ |
| 26 | 199 | $B_g$ | 56 | 550 | $A_u$ |
| 27 | 201 | $A_g$ | 57 | 606 | $B_u$ |
| 28 | 201 | $B_u$ | 58 | 607 | $B_g$ |
| 29 | 206 | $A_u$ | 59 | 620 | $A_u$ |
| 30 | 207 | $A_g$ | 60 | 647 | $A_g$ |

**Table S3.** List of fitting parameters for modes shown in Fig. 4 and Fig. S2 using three-phonon anharmonic model in the temperature range 140 K to 300 K. All units are in  $\text{cm}^{-1}$ .

| Mode | $\omega_0$       | A                 | $\Gamma_0$       | C               |
|------|------------------|-------------------|------------------|-----------------|
| P2   | $40.3 \pm 0.09$  | $0.09 \pm 0.01$   | -                | -               |
| P6   | $143.1 \pm 0.16$ | $-0.67 \pm 0.04$  | -                | -               |
| P8   | $163.7 \pm 0.16$ | $-0.74 \pm 0.05$  | -                | -               |
| P10  | $180.0 \pm 0.47$ | $1.62 \pm 0.15$   | -                | -               |
| P13  | $223.2 \pm 0.10$ | $-0.48 \pm 0.04$  | $0.06 \pm 0.28$  | $0.86 \pm 0.11$ |
| P19  | $270.8 \pm 0.09$ | $-1.53 \pm 0.04$  | $0.52 \pm 0.05$  | $0.71 \pm 0.02$ |
| P21  | $292.7 \pm 0.09$ | $-1.22 \pm 0.05$  | $0.22 \pm 0.12$  | $0.81 \pm 0.06$ |
| P24  | $318.5 \pm 0.11$ | $-2.31 \pm 0.06$  | $0.49 \pm 0.26$  | $1.95 \pm 0.14$ |
| P28  | $380.8 \pm 0.20$ | $-2.56 \pm 0.13$  | $0.21 \pm 0.19$  | $1.29 \pm 0.12$ |
| P33  | $520.8 \pm 0.15$ | $-5.73 \pm 0.11$  | $-1.92 \pm 0.14$ | $4.94 \pm 0.10$ |
| P39  | $578.8 \pm 0.16$ | $-6.25 \pm 0.12$  | $-1.61 \pm 0.33$ | $5.31 \pm 0.25$ |
| P45  | $654.5 \pm 0.97$ | $-10.11 \pm 0.79$ | $-3.67 \pm 1.80$ | $9.79 \pm 1.45$ |
| P47  | $664.4 \pm 0.21$ | $-6.64 \pm 0.18$  | $-2.23 \pm 0.24$ | $4.69 \pm 0.19$ |

## References:

- [1] R. Loudon, The Raman effect in crystals, Adv. Phys. **13**, 423 (1964).

- [2] J. Kim, J.-U. Lee, and H. Cheong, Polarized Raman spectroscopy for studying two-dimensional materials, *J. Phys.: Condens. Matter* **32**, 343001 (2020).
- [3] V. Funk, K. Wagner, E. Wietek, J. D. Ziegler, J. Förste, J. Lindlau, M. Förg, K. Watanabe, T. Taniguchi, and A. Chernikov, Spectral asymmetry of phonon sideband luminescence in monolayer and bilayer WSe<sub>2</sub>, *Phys. Rev. Research* **3**, L042019 (2021).
- [4] A. Boziki, M. I. Dar, G. Jacopin, M. Gratzel, and U. Rothlisberger, Molecular origin of the asymmetric photoluminescence spectra of CsPbBr<sub>3</sub> at low temperature, *J. Phys. Chem. Lett.* **12**, 2699 (2021).
- [5] J. Diouri, J. P. Lascaray, and M. E. Amrani, Effect of the magnetic order on the optical-absorption edge in Cd<sub>1-x</sub>Mn<sub>x</sub>Te, *Phys. Rev. B* **31**, 7995 (1985).
- [6] Y. P. Varshni, Temperature dependence of the energy gap in semiconductors, *Physica* **34**, 149 (1967).
- [7] R. Pässler, Basic model relations for temperature dependencies of fundamental energy gaps in semiconductors *Phys. Status Solidi B* **200**, 155 (1997).
- [8] P. Lautenschlager, M. Garriga, S. Logothetidis, and M. Cardona, Interband critical points of GaAs and their temperature dependence, *Phys. Rev. B* **35**, 9174 (1987).
- [9] C. Yu, Z. Chen, J. J Wang, W. Pfenninger, N. Vockic, J. T. Kenney, and K. Shum, Temperature dependence of the band gap of perovskite semiconductor compound CsSnI<sub>3</sub>, *J. Appl. Phys.* **110**, 063526 (2011).
- [10] S. Wang, J. Ma, W. Li, J. Wang, H. Wang, H. Shen, J. Li, J. Wang, H. Luo, and D. Li, Temperature-dependent band gap in two-dimensional perovskites: Thermal expansion interaction and electron–phonon interaction, *J. Phys. Chem. Lett.* **10**, 2546 (2019).
- [11] S. Rudin, T. Reinecke, and B. Segall, Temperature-dependent exciton linewidths in semiconductors, *Phys. Rev. B* **42**, 11218 (1990).
- [12] M. Leroux, N. Grandjean, B. Beaumont, G. Nataf, F. Semond, J. Massies, and P. Gibart, Temperature quenching of photoluminescence intensities in undoped and doped GaN, *J. Appl. Phys.* **86**, 3721 (1999).
